# Supplementary material for: Prospective Comparison of F-18 Choline PET/CT Scan Versus Axial MRI for Detecting Bone Metastasis in Biochemically Relapsed Prostate Cancer Patients
Source: Diagnostics (Basel). 2017 Oct 17;7(4):56. doi: 10.3390/diagnostics7040056 (PMC5745392; doi:10.3390/diagnostics7040056)
Supplement: Supplementary file 1 [file diagnostics-07-00056-s001.pdf]

**Table S1.** patient characteristics.

| <b>Characteristic</b>                                                                                                                                        | <b>All Patients (<i>n</i> = 64)</b> |
|--------------------------------------------------------------------------------------------------------------------------------------------------------------|-------------------------------------|
| <b>Primary treatment modality at PCa diagnosis</b>                                                                                                           |                                     |
| Radical prostatectomy with or without postoperative RT                                                                                                       | 46 (71.9%)                          |
| Radiotherapy with or without adjuvant ADT                                                                                                                    | 18 (28.1%)                          |
| <b>PSA at PCa diagnosis (ng/ml)</b>                                                                                                                          |                                     |
| Median (IQR)                                                                                                                                                 | 12.0 (7.5–16.9)                     |
| Unknown                                                                                                                                                      | 9                                   |
| <b>EAU prognostic grouping at PCa diagnosis</b>                                                                                                              |                                     |
| Localized                                                                                                                                                    | 22 (34%)                            |
| Locally advanced                                                                                                                                             | 44 (66%)                            |
| <b>Interval from PCa diagnosis to imaging (yr)</b>                                                                                                           |                                     |
| Median (IQR)                                                                                                                                                 | 4.7 (3.6–7.3)                       |
| <b>PSA level at time of imaging (ng/ml)</b>                                                                                                                  |                                     |
| Median (IQR)                                                                                                                                                 | 3.1 (1.2–6.5)                       |
| <b>PSA DT at time of imaging (mo)</b>                                                                                                                        |                                     |
| Median (IQR)                                                                                                                                                 | 5.9 (3.39.8)                        |
| Unknown                                                                                                                                                      | 2                                   |
| * Abbreviations: yr = year, mo = months, IQR = interquartile range, EAU = European Association of Urology, PCa = prostate cancer, PSA-DT = prostate specific |                                     |
